# Supplementary material for: HELP: A computational framework for labelling and predicting human common and context-specific essential genes
Source: PubMed Central journal article supplement (PMC11463781; doi:10.1371/journal.pcbi.1012076), 2024-09-27
Supplement: pcbi.1012076.s001.pdf [file pcbi.1012076.s001.pdf]

# HELP: A computational framework for labelling and predicting human common and context-specific essential genes

Ilaria Granata<sup>1\*</sup> , Lucia Maddalena<sup>1</sup> , Mario Manzo<sup>2</sup> , Mario Rosario Guarracino<sup>3,4</sup> , Maurizio Giordano<sup>1</sup> 

## Supplementary Figures and Tables

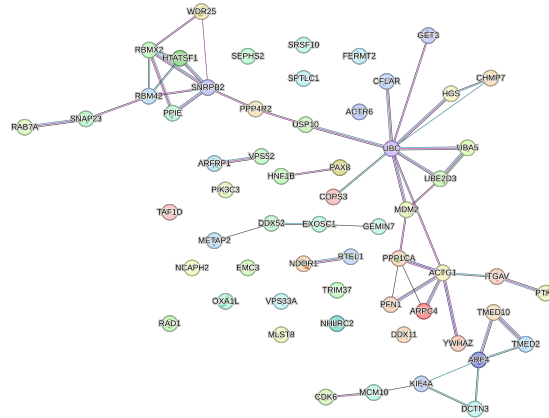

| Category         | Term ID    | Term description                              | Count in network | FDR      |
|------------------|------------|-----------------------------------------------|------------------|----------|
| GO Component     | GO:0043231 | Intracellular membrane-bounded organelle      | 55/12149         | 5.73E-05 |
| GO Process       | GO:0008152 | Metabolic process                             | 40/7988          | 0.0151   |
| GO Process       | GO:0071840 | Cellular component organization or biogenesis | 38/5639          | 9.22E-05 |
| GO Process       | GO:0008104 | Protein localization                          | 19/1943          | 0.0045   |
| GO Process       | GO:0015031 | Protein transport                             | 15/1180          | 0.0035   |
| UniProt Keywords | KW-0597    | Phosphoprotein                                | 41/8122          | 0.0026   |
| Reactome         | HSA-162582 | Signal Transduction                           | 18/2540          | 0.0233   |

(A)

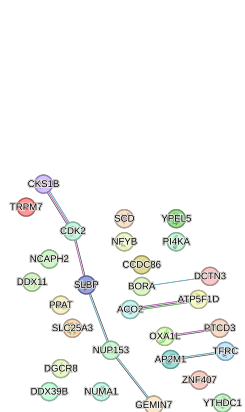

| Category         | Term ID    | Term description              | Count in network | FDR    |
|------------------|------------|-------------------------------|------------------|--------|
| GO Component     | GO:0070013 | Intracellular organelle lumen | 20/5660          | 0.0075 |
| UniProt Keywords | KW-0597    | Phosphoprotein                | 22/8122          | 0.0219 |
| Reactome         | HSA-69278  | Cell Cycle, Mitotic           | 7/526            | 0.0167 |

(B)

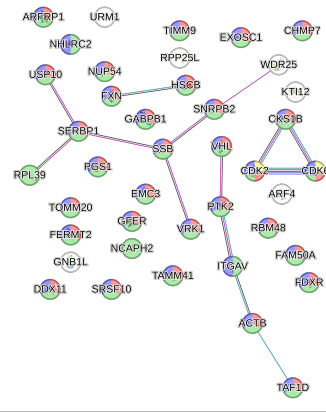

| Category     | Term ID    | Term description                         | Count in network | FDR    |
|--------------|------------|------------------------------------------|------------------|--------|
| GO Component | GO:0043229 | Intracellular organelle                  | 35/9609          | 0.0028 |
| GO Component | GO:0043227 | Membrane-bounded organelle               | 33/9083          | 0.0041 |
| GO Component | GO:0043231 | Intracellular membrane-bounded organelle | 31/8162          | 0.0041 |
| GO Component | GO:0097128 | Cyclin D1-CDK4 complex                   | 2/4              | 0.0206 |

(C)

**Fig A. ucsEGs PPI enrichment.** PPI networks built through STRING [1] using the ucsEGs computed for Kidney (A), Lung (B) and Brain (C). The nodes are coloured according to the enriched terms shown in the associated tables. The significant (False Discovery Rate, FDR < 0.05) non-redundant terms were ranked by the number of enriching genes (Count in the network: no. of enriching genes/no. of genes annotated for the term). The edges were built with all the STRING information except “Text mining”.

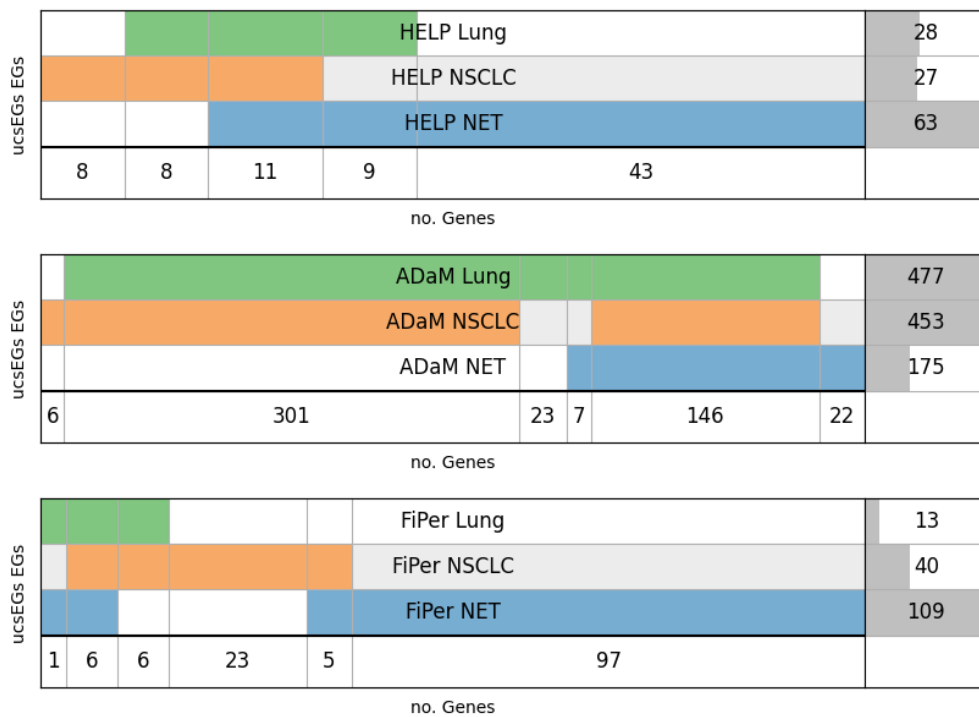

**Fig B. Disease-specific ucSEGs.** Diagram representing disease-specific (Non-Small-Cell Lung Cancer NSCLC and Lung Neuroendocrine Tumour NET) and lung ucSEGs intersections by ADaM, FiPer, and HELP labelling. Each row represents the set of ucSEGs for each labelling. The last row reports the number of genes resulting from the intersections. The last column on the right indicates the number of ucSEGs for each set, with the dark grey shadow representing the corresponding histogram.

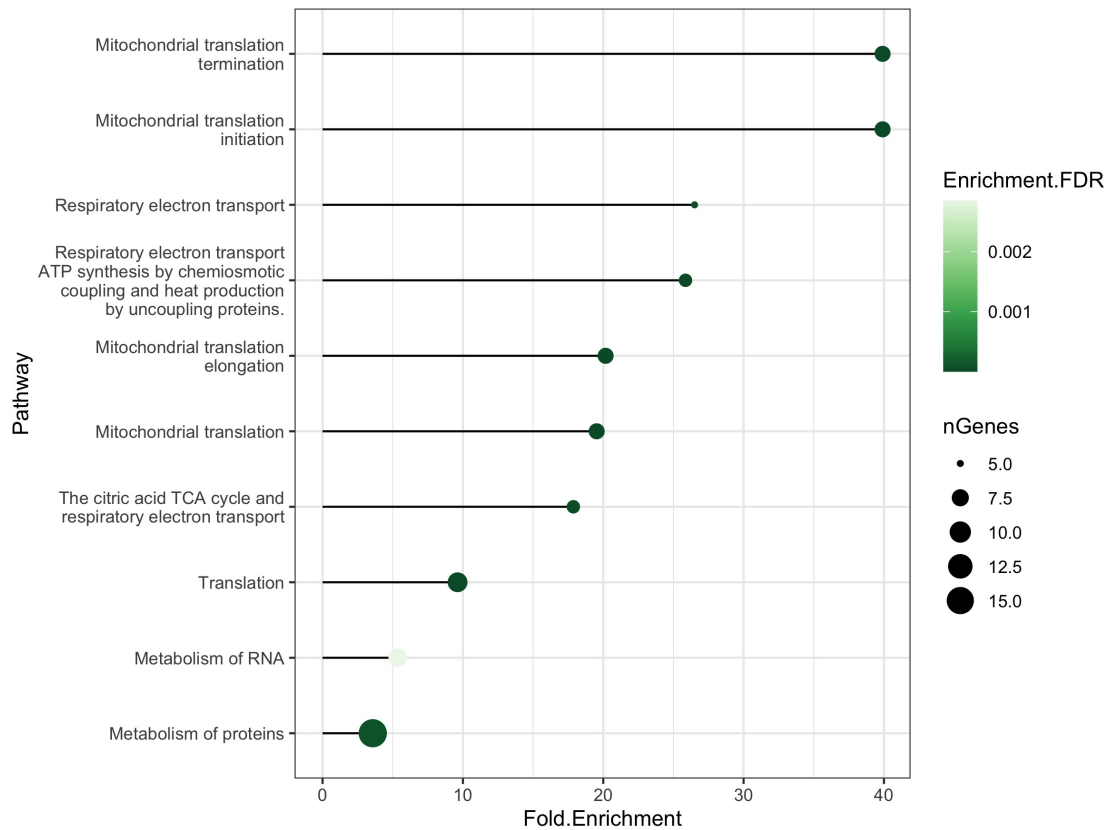

**Fig C. Reactome pathway enrichment of lung NET-specific EGs.** The significantly enriched pathways are shown on the y axis; the color bar indicates the significance in terms of False Discovery Rate (FDR)-adjusted p-value, while the dot size indicates the number of genes in the input set found in the pathway. On the x axis the Fold Enrichment, namely the percentage of genes in the input list annotated in a pathway divided by the corresponding percentage in the background human genes.

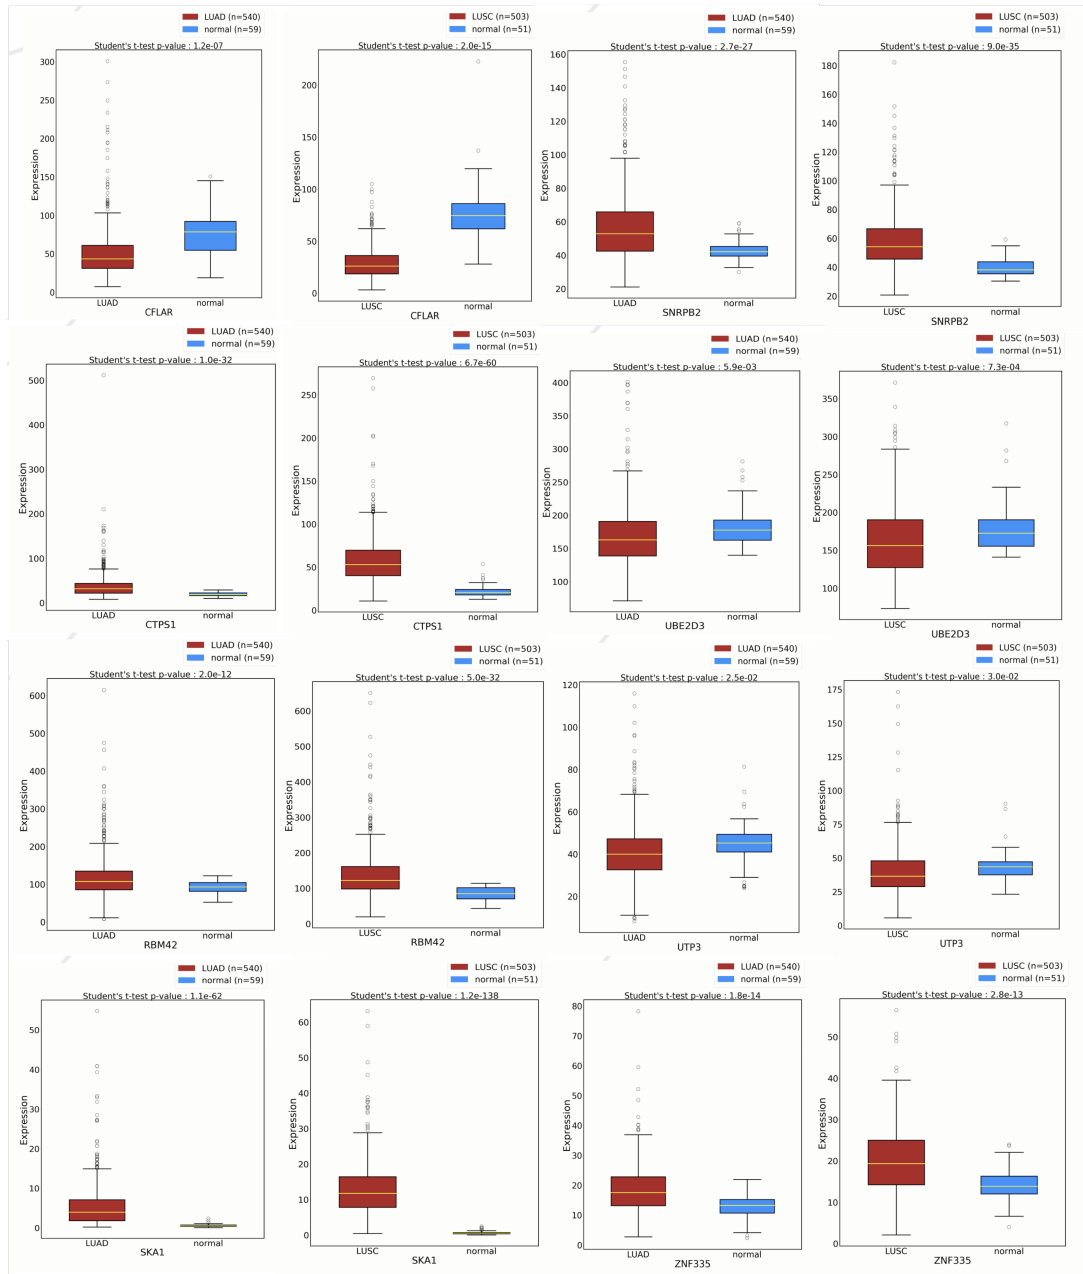

**Fig D. Differential expression of NSCLC ucEGs.** The boxplots show the expression levels of the eight NSCLC-specific EGs in the two NSCLC subtypes, LUAD and LUSC, and normal samples, as collected in OncoDB. The significance of the average difference between the two populations was evaluated with a Student's t-test using the OncoDB platform tool for the differential expression analysis. The legends indicate the colours associated with the groups and the number of samples in brackets.

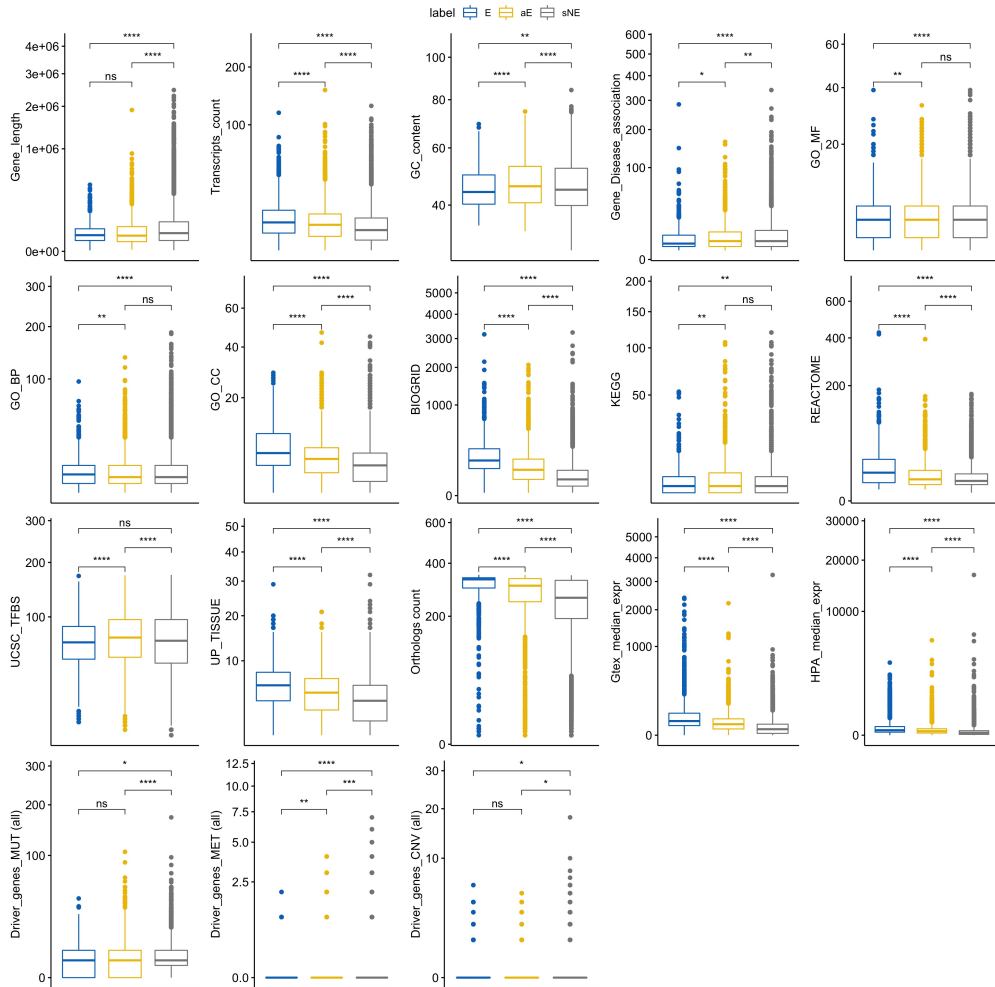

**Fig E. Boxplots of the generic Human Bio attribute values for the E, aE, and sNE classes.** The stars on the top indicate the significance of the Wilcoxon test for each pair of comparisons (\*\*\*\*  $\leq 0.0001$ , \*\*\*  $\leq 0.001$ , \*\*  $\leq 0.01$ , \*  $\leq 0.05$ , ns = not significant). In favour of visualisation, the values have been signed-square-root transformed.

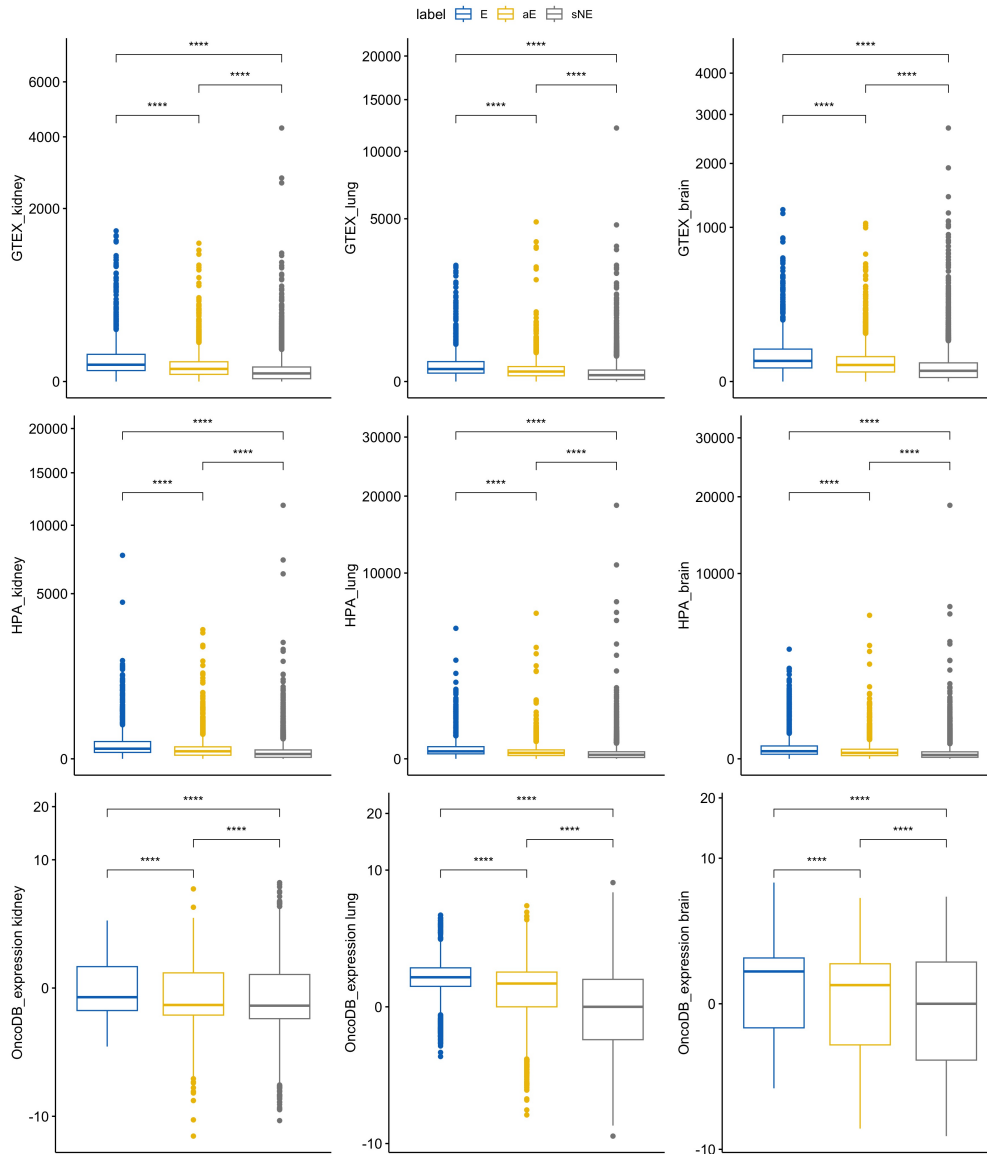

**Fig F. Boxplots of the context-specific Bio attribute values of the three tissues investigated for the E, aE, and sNE classes.** The stars on the top indicate the significance of the Wilcoxon test for each pair of comparisons (\*\*\*\*  $\leq 0.0001$ , \*\*\*  $\leq 0.001$ , \*\*  $\leq 0.01$ , \*  $\leq 0.05$ , ns = not significant). The Driver genes attributes were not shown as having small ranges of values and poor statistics. In favour of visualisation, the values have been signed-square-root transformed.

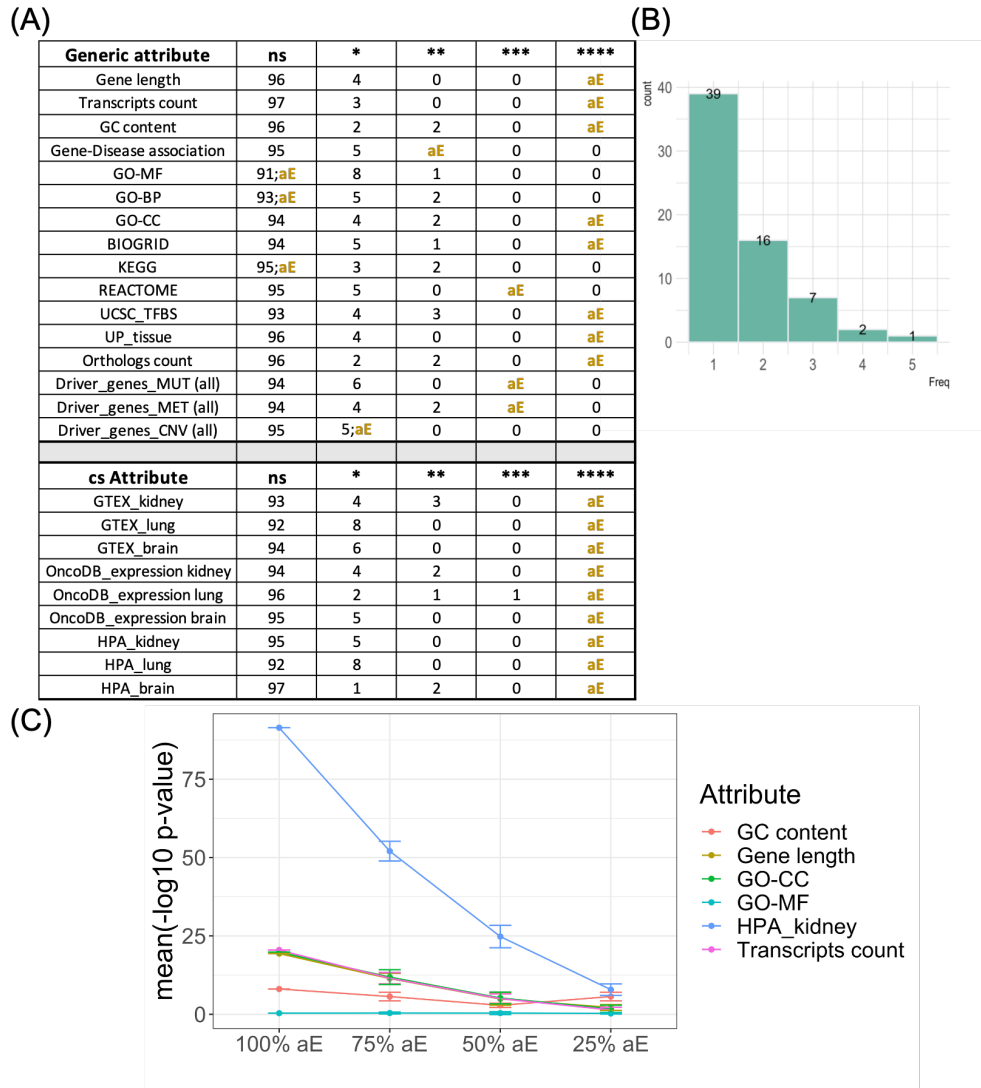

**Fig G. Random extraction of the intermediate class.** A) For each generic attribute (taken as an example from the Kidney dataset) and cs attributes from the three tissues, 100 random partitions of 3000 genes from the sNE groups have been extracted and compared to the rest of the sNE genes. For each tissue, the 100 partitions were fixed. Wilcoxon test was performed to evaluate the statistical significance (p-value) and verify whether the groups come from the same population for each pair of comparisons ( $**** \leq 0.0001$ ,  $*** \leq 0.001$ ,  $** \leq 0.01$ ,  $* \leq 0.05$ , ns = not significant). The table indicates the number of partitions for each attribute and for each significance level indicated in the column header. The level of significance given by comparing aE vs sNE, and indicated in Figs E and F, was also shown by the orange text "aE". B) The histogram shows the number of attributes (x-axis) for which the partitions are simultaneously significant. The count of partitions (y-axis) for each frequency is also shown on the bars. C) The line plot shows the mean of  $-\log_{10}(\text{p-value})$  and the standard deviation from Wilcoxon tests between different percentages of aE mixed with sNE genes (to 3000 genes) obtained with 10 iterations and the rest of sNE genes for some attributes indicated in the legend.

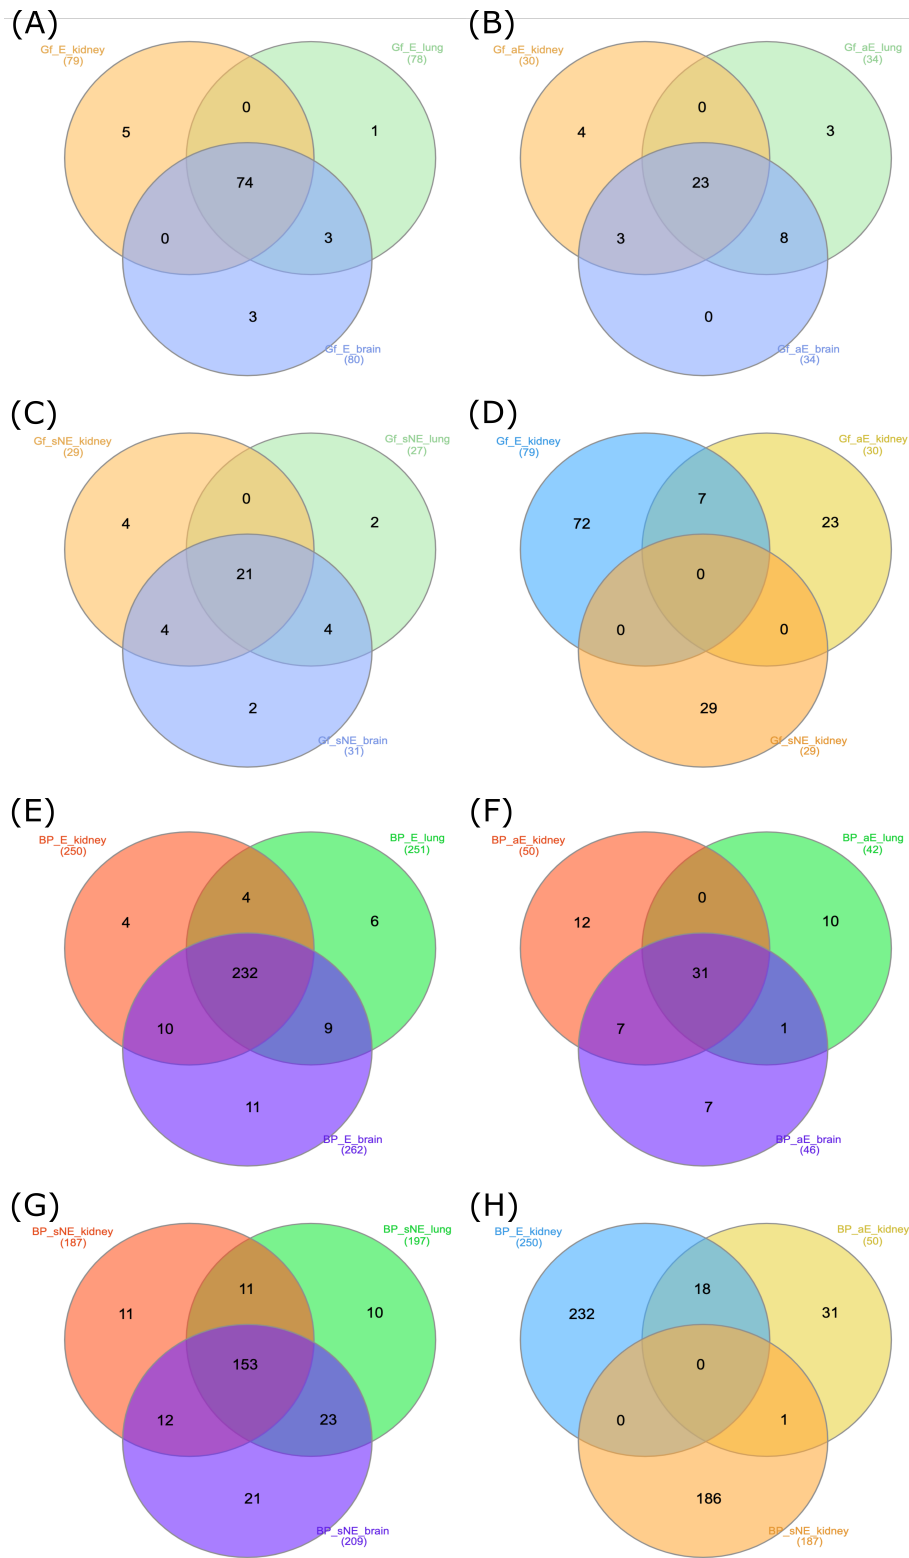

**Fig H. Intersection of Gene Families and Biological Processes enrichment among E, aE and sNE genes.** The Venn diagrams show the intersection of Gene Families (gf) and Gene-Ontology Biological Processes (BP) enriched by E, aE or sNE genes among the three tissue contexts under study (A-C; E-G), as well as the intersection of Gene Families (gf) and Gene-Ontology Biological Processes (BP) enriched by genes of the three classes in one context (here Kidney tissue as example) (D and H). The number of genes composing each set is shown in brackets.



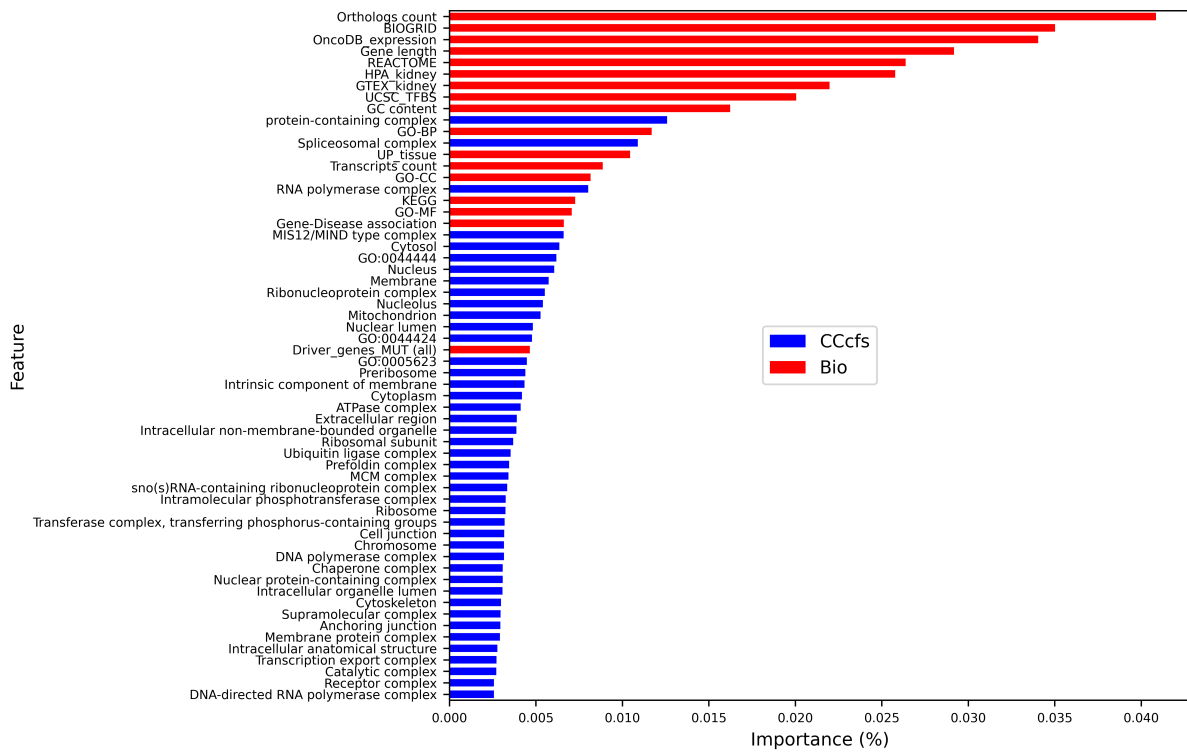

**Fig I. Feature importance analysis.** Bio+CCcfs attributes importance calculated by training a sveLGBM model on the entire dataset. The plot cuts-off feature with importance lower than 0.25 %.

**Table A. Collected genomic, transcriptomic, epigenetic, functional and evolutionary features of genes.** (cs) indicates the context-specific attributes.

| Category                 | Attribute                                 | Description                                                                     | Data Source                 |
|--------------------------|-------------------------------------------|---------------------------------------------------------------------------------|-----------------------------|
| Structure                | Gene length                               | Gene End (bp) - Gene Start (bp)                                                 | biomaRt R package v2.54 [2] |
|                          | GC content                                | % of Guanosine + Cytosine                                                       |                             |
|                          | Transcripts count                         | No. of transcripts/gene                                                         |                             |
| Expression               | GTEX_* (cs)                               | Gene median expression in the context of interest                               | GTEX portal [3]             |
|                          | UP_tissue                                 | Count of annotated expression in tissues                                        | DAVID [4]                   |
|                          | OncoDB_expression (cs)                    | Differential Gene Expression in cancer                                          | OncoDB [5]                  |
|                          | HPA_* (cs)                                | Normalised transcript expression summarised per gene in the context of interest | HPA [6]                     |
| Function & Localisation  | GO-MF                                     | No. of GO-MF annotations                                                        | DAVID [4]                   |
|                          | GO-BP                                     | No. of GO-BP annotations                                                        |                             |
|                          | GO-CC                                     | No. of GO-CC annotations                                                        |                             |
|                          | KEGG                                      | No. of KEGG pathway annotations                                                 |                             |
|                          | REACTOME                                  | No. of REACTOME pathway annotations                                             | COMPARTMENTS [7]            |
| CCcfs                    | Subcellular localisation confidence score |                                                                                 |                             |
| Interaction              | BIOGRID                                   | No. of BIOGRID interactions annotations                                         | DAVID [4]                   |
|                          | UCSC_TFBS                                 | Transcription factors binding sites prediction                                  |                             |
| Conservation             | Orthologs count                           | No. of orthologous/gene                                                         | NCBI [8]                    |
| Association with Disease | Driver_genes_MUT (cs)                     | No. of predictions as 'MUT driver' in cancer                                    | DriverDBv3 [9]              |
|                          | Driver_genes_CNV (cs)                     | No. of predictions as 'CNV driver' in cancer                                    |                             |
|                          | Driver_genes_MET (cs)                     | No. of predictions as 'Methylation driver' in cancer                            | DisGeNet [10]               |
|                          | Gene-Disease association                  | No. of associations with diseases                                               |                             |

**Table B. Comparison of classifiers on prediction in “E vs NE” problem in the Kidney case study.** Ranking of methods is based on the Balanced Accuracy metric. All methods with “sve” prefix are our meta-learning model proposal with a different base classifier as member of the ensemble. All other methods are provided by the PyCaret library. All models were trained with Bio+CCcfs+N2V attributes of genes. CPU times are measured on Apple M2 with 16GB RAM.

| Model                           | Accuracy | ROC-AUC  | Sensitivity | Specificity | BA       | TT (Sec)  |
|---------------------------------|----------|----------|-------------|-------------|----------|-----------|
| sveLGBM                         | 0.850100 | 0.951200 | 0.914800    | 0.845000    | 0.879900 | 14.608000 |
| sveADA                          | 0.856900 | 0.945400 | 0.901100    | 0.853500    | 0.877300 | 13.146000 |
| sveET                           | 0.866600 | 0.936400 | 0.852700    | 0.867600    | 0.860200 | 3.588000  |
| sveRF                           | 0.883200 | 0.938600 | 0.832000    | 0.887200    | 0.859600 | 3.008000  |
| Random Forest Classifier        | 0.810200 | 0.903600 | 0.830800    | 0.808600    | 0.819700 | 0.916000  |
| Extra Trees Classifier          | 0.826100 | 0.871100 | 0.761800    | 0.831100    | 0.796500 | 0.758000  |
| Linear Discriminant Analysis    | 0.945500 | 0.931800 | 0.619100    | 0.970900    | 0.795000 | 6.512000  |
| sveLDA                          | 0.740800 | 0.856100 | 0.837800    | 0.733300    | 0.785500 | 5.074000  |
| Logistic Regression             | 0.899400 | 0.842400 | 0.627200    | 0.920500    | 0.773900 | 1.572000  |
| SVM - Linear Kernel             | 0.885200 | 0.827900 | 0.600700    | 0.907300    | 0.754000 | 19.138000 |
| Ada Boost Classifier            | 0.943700 | 0.928900 | 0.492500    | 0.978700    | 0.735600 | 4.790000  |
| Light Gradient Boosting Machine | 0.947900 | 0.940600 | 0.474100    | 0.984700    | 0.729400 | 2.174000  |

**Table C. sveLGBM tuning of parameters with Optuna library [11].** Optimization was carried out on “E vs NE” classification problem with a stratified 5-fold cross-validation with Bio+CCcfs+N2V features by maximising BA metric.

| Trial no. | boosting_type | learning_rate | n_estimators | n_voters | BA       |
|-----------|---------------|---------------|--------------|----------|----------|
| 37        | gbdt          | 0.094505      | 200          | 13       | 0.893151 |
| 15        | gbdt          | 0.098300      | 140          | 10       | 0.891459 |
| 44        | gbdt          | 0.076452      | 200          | 12       | 0.890954 |
| 43        | gbdt          | 0.075168      | 200          | 12       | 0.890826 |
| 41        | gbdt          | 0.078591      | 200          | 13       | 0.890602 |
| 33        | gbdt          | 0.098020      | 180          | 13       | 0.890241 |
| 31        | gbdt          | 0.059095      | 160          | 11       | 0.889936 |
| 34        | gbdt          | 0.085756      | 200          | 13       | 0.889739 |
| 22        | gbdt          | 0.063759      | 180          | 9        | 0.889298 |
| 30        | gbdt          | 0.054934      | 160          | 12       | 0.889146 |
| 36        | gbdt          | 0.076796      | 200          | 14       | 0.889028 |
| 23        | gbdt          | 0.065602      | 160          | 9        | 0.888994 |
| 42        | gbdt          | 0.076634      | 200          | 16       | 0.888759 |
| 40        | gbdt          | 0.044127      | 180          | 10       | 0.888419 |
| 4         | gbdt          | 0.088891      | 140          | 15       | 0.888175 |
| 39        | gbdt          | 0.098960      | 140          | 14       | 0.887998 |
| 49        | gbdt          | 0.057674      | 200          | 16       | 0.887826 |
| 11        | gbdt          | 0.059871      | 180          | 15       | 0.886745 |
| 47        | gbdt          | 0.049777      | 200          | 14       | 0.886566 |
| 29        | gbdt          | 0.042902      | 180          | 9        | 0.886259 |
| 32        | gbdt          | 0.052158      | 140          | 11       | 0.885557 |
| ...       | ...           | ...           | ...          | ...      | ...      |
| 5         | gbdt          | 0.001175      | 100          | 7        | 0.500000 |

**Table D. Classification performance metrics adopted in the experiments.** They are defined in terms of the number of true positives (TP), true negatives (TN), false positives (FP), and false negatives (FN), where the first class in each binary task (e.g. class E in the “E vs NE” classification task) is assumed as the positive class.

| Metric                 | Description                                            | Formula                                                                                                                                            |    |    |    |    |
|------------------------|--------------------------------------------------------|----------------------------------------------------------------------------------------------------------------------------------------------------|----|----|----|----|
| Accuracy               | % of correctly classified samples                      | $\frac{TP+TN}{TP+FP+FN+TN}$                                                                                                                        |    |    |    |    |
| Specificity (TNR)      | % of negative samples correctly classified             | $\frac{TN}{TN+FP}$                                                                                                                                 |    |    |    |    |
| Sensitivity (TPR)      | % of positive samples correctly classified             | $\frac{TP}{TP+FN}$                                                                                                                                 |    |    |    |    |
| Balanced Accuracy (BA) | Average of Specificity and Sensitivity                 | $\frac{1}{2}(\text{Sensitivity} + \text{Specificity})$                                                                                             |    |    |    |    |
| ROC-AUC                | Area Under the Receiver Operating Characteristic curve | $\int_0^1 \text{Sensitivity}(x)dx,$<br>$x = 1 - \text{Specificity}$                                                                                |    |    |    |    |
| CM                     | Confusion Matrix                                       | <table border="1" style="display: inline-table; vertical-align: middle;"> <tr><td>TN</td><td>FP</td></tr> <tr><td>FN</td><td>TP</td></tr> </table> | TN | FP | FN | TP |
| TN                     | FP                                                     |                                                                                                                                                    |    |    |    |    |
| FN                     | TP                                                     |                                                                                                                                                    |    |    |    |    |

Apart from the confusion matrix, all the metrics assume values in [0,1], except ROC-AUC, which ranges in [0.5,1]; higher values indicate better performance.

**Table E. “E vs NE” classification performance based on HELP labelling.** (A) Kidney, (B) Lung, (C) Brain tissues, and (D) Human. Averages and errors of metrics are obtained on fifty measurements related to ten times iterated 5-fold cross-validation. The averaged Confusion Matrix (CM) is also shown.

| feature     | Bio                                                                                                                                                                               | N2V         | CCcfs       | Bio+CCcfs   | Bio+CCcfs+N2V |         |        |   |       |        |                                                                                                                                                                                   |      |    |   |         |         |        |   |       |        |                                                                                                                                                                                   |      |    |   |         |         |        |   |       |        |                                                                                                                                                                                   |      |    |   |         |         |        |   |       |        |                                                                                                                                                                                   |      |    |   |         |         |        |   |       |        |
|-------------|-----------------------------------------------------------------------------------------------------------------------------------------------------------------------------------|-------------|-------------|-------------|---------------|---------|--------|---|-------|--------|-----------------------------------------------------------------------------------------------------------------------------------------------------------------------------------|------|----|---|---------|---------|--------|---|-------|--------|-----------------------------------------------------------------------------------------------------------------------------------------------------------------------------------|------|----|---|---------|---------|--------|---|-------|--------|-----------------------------------------------------------------------------------------------------------------------------------------------------------------------------------|------|----|---|---------|---------|--------|---|-------|--------|-----------------------------------------------------------------------------------------------------------------------------------------------------------------------------------|------|----|---|---------|---------|--------|---|-------|--------|
| (A) Kidney  |                                                                                                                                                                                   |             |             |             |               |         |        |   |       |        |                                                                                                                                                                                   |      |    |   |         |         |        |   |       |        |                                                                                                                                                                                   |      |    |   |         |         |        |   |       |        |                                                                                                                                                                                   |      |    |   |         |         |        |   |       |        |                                                                                                                                                                                   |      |    |   |         |         |        |   |       |        |
| ROC-AUC     | 0.914±0.007                                                                                                                                                                       | 0.929±0.008 | 0.940±0.008 | 0.956±0.005 | 0.958±0.006   |         |        |   |       |        |                                                                                                                                                                                   |      |    |   |         |         |        |   |       |        |                                                                                                                                                                                   |      |    |   |         |         |        |   |       |        |                                                                                                                                                                                   |      |    |   |         |         |        |   |       |        |                                                                                                                                                                                   |      |    |   |         |         |        |   |       |        |
| Accuracy    | 0.795±0.007                                                                                                                                                                       | 0.845±0.006 | 0.861±0.006 | 0.877±0.005 | 0.880±0.005   |         |        |   |       |        |                                                                                                                                                                                   |      |    |   |         |         |        |   |       |        |                                                                                                                                                                                   |      |    |   |         |         |        |   |       |        |                                                                                                                                                                                   |      |    |   |         |         |        |   |       |        |                                                                                                                                                                                   |      |    |   |         |         |        |   |       |        |
| BA          | 0.832±0.010                                                                                                                                                                       | 0.854±0.013 | 0.867±0.012 | 0.887±0.010 | 0.892±0.009   |         |        |   |       |        |                                                                                                                                                                                   |      |    |   |         |         |        |   |       |        |                                                                                                                                                                                   |      |    |   |         |         |        |   |       |        |                                                                                                                                                                                   |      |    |   |         |         |        |   |       |        |                                                                                                                                                                                   |      |    |   |         |         |        |   |       |        |
| Sensitivity | 0.875±0.020                                                                                                                                                                       | 0.864±0.027 | 0.873±0.023 | 0.899±0.020 | 0.905±0.019   |         |        |   |       |        |                                                                                                                                                                                   |      |    |   |         |         |        |   |       |        |                                                                                                                                                                                   |      |    |   |         |         |        |   |       |        |                                                                                                                                                                                   |      |    |   |         |         |        |   |       |        |                                                                                                                                                                                   |      |    |   |         |         |        |   |       |        |
| Specificity | 0.789±0.007                                                                                                                                                                       | 0.843±0.007 | 0.861±0.006 | 0.876±0.005 | 0.878±0.005   |         |        |   |       |        |                                                                                                                                                                                   |      |    |   |         |         |        |   |       |        |                                                                                                                                                                                   |      |    |   |         |         |        |   |       |        |                                                                                                                                                                                   |      |    |   |         |         |        |   |       |        |                                                                                                                                                                                   |      |    |   |         |         |        |   |       |        |
| CM          | <table border="1"> <tr><td>pred</td><td>NE</td><td>E</td></tr> <tr><td>true NE</td><td>12618.1</td><td>3375.9</td></tr> <tr><td>E</td><td>155.3</td><td>1086.7</td></tr> </table> | pred        | NE          | E           | true NE       | 12618.1 | 3375.9 | E | 155.3 | 1086.7 | <table border="1"> <tr><td>pred</td><td>NE</td><td>E</td></tr> <tr><td>true NE</td><td>13486.2</td><td>2507.8</td></tr> <tr><td>E</td><td>169.0</td><td>1073.0</td></tr> </table> | pred | NE | E | true NE | 13486.2 | 2507.8 | E | 169.0 | 1073.0 | <table border="1"> <tr><td>pred</td><td>NE</td><td>E</td></tr> <tr><td>true NE</td><td>13763.9</td><td>2230.1</td></tr> <tr><td>E</td><td>157.7</td><td>1084.3</td></tr> </table> | pred | NE | E | true NE | 13763.9 | 2230.1 | E | 157.7 | 1084.3 | <table border="1"> <tr><td>pred</td><td>NE</td><td>E</td></tr> <tr><td>true NE</td><td>14003.7</td><td>1990.3</td></tr> <tr><td>E</td><td>125.2</td><td>1116.8</td></tr> </table> | pred | NE | E | true NE | 14003.7 | 1990.3 | E | 125.2 | 1116.8 | <table border="1"> <tr><td>pred</td><td>NE</td><td>E</td></tr> <tr><td>true NE</td><td>14041.4</td><td>1952.6</td></tr> <tr><td>E</td><td>117.8</td><td>1124.2</td></tr> </table> | pred | NE | E | true NE | 14041.4 | 1952.6 | E | 117.8 | 1124.2 |
| pred        | NE                                                                                                                                                                                | E           |             |             |               |         |        |   |       |        |                                                                                                                                                                                   |      |    |   |         |         |        |   |       |        |                                                                                                                                                                                   |      |    |   |         |         |        |   |       |        |                                                                                                                                                                                   |      |    |   |         |         |        |   |       |        |                                                                                                                                                                                   |      |    |   |         |         |        |   |       |        |
| true NE     | 12618.1                                                                                                                                                                           | 3375.9      |             |             |               |         |        |   |       |        |                                                                                                                                                                                   |      |    |   |         |         |        |   |       |        |                                                                                                                                                                                   |      |    |   |         |         |        |   |       |        |                                                                                                                                                                                   |      |    |   |         |         |        |   |       |        |                                                                                                                                                                                   |      |    |   |         |         |        |   |       |        |
| E           | 155.3                                                                                                                                                                             | 1086.7      |             |             |               |         |        |   |       |        |                                                                                                                                                                                   |      |    |   |         |         |        |   |       |        |                                                                                                                                                                                   |      |    |   |         |         |        |   |       |        |                                                                                                                                                                                   |      |    |   |         |         |        |   |       |        |                                                                                                                                                                                   |      |    |   |         |         |        |   |       |        |
| pred        | NE                                                                                                                                                                                | E           |             |             |               |         |        |   |       |        |                                                                                                                                                                                   |      |    |   |         |         |        |   |       |        |                                                                                                                                                                                   |      |    |   |         |         |        |   |       |        |                                                                                                                                                                                   |      |    |   |         |         |        |   |       |        |                                                                                                                                                                                   |      |    |   |         |         |        |   |       |        |
| true NE     | 13486.2                                                                                                                                                                           | 2507.8      |             |             |               |         |        |   |       |        |                                                                                                                                                                                   |      |    |   |         |         |        |   |       |        |                                                                                                                                                                                   |      |    |   |         |         |        |   |       |        |                                                                                                                                                                                   |      |    |   |         |         |        |   |       |        |                                                                                                                                                                                   |      |    |   |         |         |        |   |       |        |
| E           | 169.0                                                                                                                                                                             | 1073.0      |             |             |               |         |        |   |       |        |                                                                                                                                                                                   |      |    |   |         |         |        |   |       |        |                                                                                                                                                                                   |      |    |   |         |         |        |   |       |        |                                                                                                                                                                                   |      |    |   |         |         |        |   |       |        |                                                                                                                                                                                   |      |    |   |         |         |        |   |       |        |
| pred        | NE                                                                                                                                                                                | E           |             |             |               |         |        |   |       |        |                                                                                                                                                                                   |      |    |   |         |         |        |   |       |        |                                                                                                                                                                                   |      |    |   |         |         |        |   |       |        |                                                                                                                                                                                   |      |    |   |         |         |        |   |       |        |                                                                                                                                                                                   |      |    |   |         |         |        |   |       |        |
| true NE     | 13763.9                                                                                                                                                                           | 2230.1      |             |             |               |         |        |   |       |        |                                                                                                                                                                                   |      |    |   |         |         |        |   |       |        |                                                                                                                                                                                   |      |    |   |         |         |        |   |       |        |                                                                                                                                                                                   |      |    |   |         |         |        |   |       |        |                                                                                                                                                                                   |      |    |   |         |         |        |   |       |        |
| E           | 157.7                                                                                                                                                                             | 1084.3      |             |             |               |         |        |   |       |        |                                                                                                                                                                                   |      |    |   |         |         |        |   |       |        |                                                                                                                                                                                   |      |    |   |         |         |        |   |       |        |                                                                                                                                                                                   |      |    |   |         |         |        |   |       |        |                                                                                                                                                                                   |      |    |   |         |         |        |   |       |        |
| pred        | NE                                                                                                                                                                                | E           |             |             |               |         |        |   |       |        |                                                                                                                                                                                   |      |    |   |         |         |        |   |       |        |                                                                                                                                                                                   |      |    |   |         |         |        |   |       |        |                                                                                                                                                                                   |      |    |   |         |         |        |   |       |        |                                                                                                                                                                                   |      |    |   |         |         |        |   |       |        |
| true NE     | 14003.7                                                                                                                                                                           | 1990.3      |             |             |               |         |        |   |       |        |                                                                                                                                                                                   |      |    |   |         |         |        |   |       |        |                                                                                                                                                                                   |      |    |   |         |         |        |   |       |        |                                                                                                                                                                                   |      |    |   |         |         |        |   |       |        |                                                                                                                                                                                   |      |    |   |         |         |        |   |       |        |
| E           | 125.2                                                                                                                                                                             | 1116.8      |             |             |               |         |        |   |       |        |                                                                                                                                                                                   |      |    |   |         |         |        |   |       |        |                                                                                                                                                                                   |      |    |   |         |         |        |   |       |        |                                                                                                                                                                                   |      |    |   |         |         |        |   |       |        |                                                                                                                                                                                   |      |    |   |         |         |        |   |       |        |
| pred        | NE                                                                                                                                                                                | E           |             |             |               |         |        |   |       |        |                                                                                                                                                                                   |      |    |   |         |         |        |   |       |        |                                                                                                                                                                                   |      |    |   |         |         |        |   |       |        |                                                                                                                                                                                   |      |    |   |         |         |        |   |       |        |                                                                                                                                                                                   |      |    |   |         |         |        |   |       |        |
| true NE     | 14041.4                                                                                                                                                                           | 1952.6      |             |             |               |         |        |   |       |        |                                                                                                                                                                                   |      |    |   |         |         |        |   |       |        |                                                                                                                                                                                   |      |    |   |         |         |        |   |       |        |                                                                                                                                                                                   |      |    |   |         |         |        |   |       |        |                                                                                                                                                                                   |      |    |   |         |         |        |   |       |        |
| E           | 117.8                                                                                                                                                                             | 1124.2      |             |             |               |         |        |   |       |        |                                                                                                                                                                                   |      |    |   |         |         |        |   |       |        |                                                                                                                                                                                   |      |    |   |         |         |        |   |       |        |                                                                                                                                                                                   |      |    |   |         |         |        |   |       |        |                                                                                                                                                                                   |      |    |   |         |         |        |   |       |        |
| (B) Lung    |                                                                                                                                                                                   |             |             |             |               |         |        |   |       |        |                                                                                                                                                                                   |      |    |   |         |         |        |   |       |        |                                                                                                                                                                                   |      |    |   |         |         |        |   |       |        |                                                                                                                                                                                   |      |    |   |         |         |        |   |       |        |                                                                                                                                                                                   |      |    |   |         |         |        |   |       |        |
| ROC-AUC     | 0.918±0.006                                                                                                                                                                       | 0.931±0.008 | 0.941±0.006 | 0.957±0.005 | 0.959±0.005   |         |        |   |       |        |                                                                                                                                                                                   |      |    |   |         |         |        |   |       |        |                                                                                                                                                                                   |      |    |   |         |         |        |   |       |        |                                                                                                                                                                                   |      |    |   |         |         |        |   |       |        |                                                                                                                                                                                   |      |    |   |         |         |        |   |       |        |
| Accuracy    | 0.800±0.007                                                                                                                                                                       | 0.852±0.005 | 0.845±0.014 | 0.878±0.005 | 0.882±0.005   |         |        |   |       |        |                                                                                                                                                                                   |      |    |   |         |         |        |   |       |        |                                                                                                                                                                                   |      |    |   |         |         |        |   |       |        |                                                                                                                                                                                   |      |    |   |         |         |        |   |       |        |                                                                                                                                                                                   |      |    |   |         |         |        |   |       |        |
| BA          | 0.839±0.010                                                                                                                                                                       | 0.857±0.011 | 0.864±0.011 | 0.891±0.009 | 0.895±0.009   |         |        |   |       |        |                                                                                                                                                                                   |      |    |   |         |         |        |   |       |        |                                                                                                                                                                                   |      |    |   |         |         |        |   |       |        |                                                                                                                                                                                   |      |    |   |         |         |        |   |       |        |                                                                                                                                                                                   |      |    |   |         |         |        |   |       |        |
| Sensitivity | 0.884±0.019                                                                                                                                                                       | 0.863±0.022 | 0.885±0.031 | 0.905±0.017 | 0.910±0.018   |         |        |   |       |        |                                                                                                                                                                                   |      |    |   |         |         |        |   |       |        |                                                                                                                                                                                   |      |    |   |         |         |        |   |       |        |                                                                                                                                                                                   |      |    |   |         |         |        |   |       |        |                                                                                                                                                                                   |      |    |   |         |         |        |   |       |        |
| Specificity | 0.793±0.008                                                                                                                                                                       | 0.851±0.005 | 0.842±0.017 | 0.876±0.005 | 0.879±0.005   |         |        |   |       |        |                                                                                                                                                                                   |      |    |   |         |         |        |   |       |        |                                                                                                                                                                                   |      |    |   |         |         |        |   |       |        |                                                                                                                                                                                   |      |    |   |         |         |        |   |       |        |                                                                                                                                                                                   |      |    |   |         |         |        |   |       |        |
| CM          | <table border="1"> <tr><td>pred</td><td>NE</td><td>E</td></tr> <tr><td>true NE</td><td>12701.7</td><td>3308.3</td></tr> <tr><td>E</td><td>142.2</td><td>1081.8</td></tr> </table> | pred        | NE          | E           | true NE       | 12701.7 | 3308.3 | E | 142.2 | 1081.8 | <table border="1"> <tr><td>pred</td><td>NE</td><td>E</td></tr> <tr><td>true NE</td><td>13619.7</td><td>2390.3</td></tr> <tr><td>E</td><td>168.2</td><td>1055.8</td></tr> </table> | pred | NE | E | true NE | 13619.7 | 2390.3 | E | 168.2 | 1055.8 | <table border="1"> <tr><td>pred</td><td>NE</td><td>E</td></tr> <tr><td>true NE</td><td>13486.1</td><td>2523.9</td></tr> <tr><td>E</td><td>140.9</td><td>1083.1</td></tr> </table> | pred | NE | E | true NE | 13486.1 | 2523.9 | E | 140.9 | 1083.1 | <table border="1"> <tr><td>pred</td><td>NE</td><td>E</td></tr> <tr><td>true NE</td><td>14021.9</td><td>1988.1</td></tr> <tr><td>E</td><td>116.0</td><td>1108.0</td></tr> </table> | pred | NE | E | true NE | 14021.9 | 1988.1 | E | 116.0 | 1108.0 | <table border="1"> <tr><td>pred</td><td>NE</td><td>E</td></tr> <tr><td>true NE</td><td>14078.9</td><td>1931.1</td></tr> <tr><td>E</td><td>109.7</td><td>1114.3</td></tr> </table> | pred | NE | E | true NE | 14078.9 | 1931.1 | E | 109.7 | 1114.3 |
| pred        | NE                                                                                                                                                                                | E           |             |             |               |         |        |   |       |        |                                                                                                                                                                                   |      |    |   |         |         |        |   |       |        |                                                                                                                                                                                   |      |    |   |         |         |        |   |       |        |                                                                                                                                                                                   |      |    |   |         |         |        |   |       |        |                                                                                                                                                                                   |      |    |   |         |         |        |   |       |        |
| true NE     | 12701.7                                                                                                                                                                           | 3308.3      |             |             |               |         |        |   |       |        |                                                                                                                                                                                   |      |    |   |         |         |        |   |       |        |                                                                                                                                                                                   |      |    |   |         |         |        |   |       |        |                                                                                                                                                                                   |      |    |   |         |         |        |   |       |        |                                                                                                                                                                                   |      |    |   |         |         |        |   |       |        |
| E           | 142.2                                                                                                                                                                             | 1081.8      |             |             |               |         |        |   |       |        |                                                                                                                                                                                   |      |    |   |         |         |        |   |       |        |                                                                                                                                                                                   |      |    |   |         |         |        |   |       |        |                                                                                                                                                                                   |      |    |   |         |         |        |   |       |        |                                                                                                                                                                                   |      |    |   |         |         |        |   |       |        |
| pred        | NE                                                                                                                                                                                | E           |             |             |               |         |        |   |       |        |                                                                                                                                                                                   |      |    |   |         |         |        |   |       |        |                                                                                                                                                                                   |      |    |   |         |         |        |   |       |        |                                                                                                                                                                                   |      |    |   |         |         |        |   |       |        |                                                                                                                                                                                   |      |    |   |         |         |        |   |       |        |
| true NE     | 13619.7                                                                                                                                                                           | 2390.3      |             |             |               |         |        |   |       |        |                                                                                                                                                                                   |      |    |   |         |         |        |   |       |        |                                                                                                                                                                                   |      |    |   |         |         |        |   |       |        |                                                                                                                                                                                   |      |    |   |         |         |        |   |       |        |                                                                                                                                                                                   |      |    |   |         |         |        |   |       |        |
| E           | 168.2                                                                                                                                                                             | 1055.8      |             |             |               |         |        |   |       |        |                                                                                                                                                                                   |      |    |   |         |         |        |   |       |        |                                                                                                                                                                                   |      |    |   |         |         |        |   |       |        |                                                                                                                                                                                   |      |    |   |         |         |        |   |       |        |                                                                                                                                                                                   |      |    |   |         |         |        |   |       |        |
| pred        | NE                                                                                                                                                                                | E           |             |             |               |         |        |   |       |        |                                                                                                                                                                                   |      |    |   |         |         |        |   |       |        |                                                                                                                                                                                   |      |    |   |         |         |        |   |       |        |                                                                                                                                                                                   |      |    |   |         |         |        |   |       |        |                                                                                                                                                                                   |      |    |   |         |         |        |   |       |        |
| true NE     | 13486.1                                                                                                                                                                           | 2523.9      |             |             |               |         |        |   |       |        |                                                                                                                                                                                   |      |    |   |         |         |        |   |       |        |                                                                                                                                                                                   |      |    |   |         |         |        |   |       |        |                                                                                                                                                                                   |      |    |   |         |         |        |   |       |        |                                                                                                                                                                                   |      |    |   |         |         |        |   |       |        |
| E           | 140.9                                                                                                                                                                             | 1083.1      |             |             |               |         |        |   |       |        |                                                                                                                                                                                   |      |    |   |         |         |        |   |       |        |                                                                                                                                                                                   |      |    |   |         |         |        |   |       |        |                                                                                                                                                                                   |      |    |   |         |         |        |   |       |        |                                                                                                                                                                                   |      |    |   |         |         |        |   |       |        |
| pred        | NE                                                                                                                                                                                | E           |             |             |               |         |        |   |       |        |                                                                                                                                                                                   |      |    |   |         |         |        |   |       |        |                                                                                                                                                                                   |      |    |   |         |         |        |   |       |        |                                                                                                                                                                                   |      |    |   |         |         |        |   |       |        |                                                                                                                                                                                   |      |    |   |         |         |        |   |       |        |
| true NE     | 14021.9                                                                                                                                                                           | 1988.1      |             |             |               |         |        |   |       |        |                                                                                                                                                                                   |      |    |   |         |         |        |   |       |        |                                                                                                                                                                                   |      |    |   |         |         |        |   |       |        |                                                                                                                                                                                   |      |    |   |         |         |        |   |       |        |                                                                                                                                                                                   |      |    |   |         |         |        |   |       |        |
| E           | 116.0                                                                                                                                                                             | 1108.0      |             |             |               |         |        |   |       |        |                                                                                                                                                                                   |      |    |   |         |         |        |   |       |        |                                                                                                                                                                                   |      |    |   |         |         |        |   |       |        |                                                                                                                                                                                   |      |    |   |         |         |        |   |       |        |                                                                                                                                                                                   |      |    |   |         |         |        |   |       |        |
| pred        | NE                                                                                                                                                                                | E           |             |             |               |         |        |   |       |        |                                                                                                                                                                                   |      |    |   |         |         |        |   |       |        |                                                                                                                                                                                   |      |    |   |         |         |        |   |       |        |                                                                                                                                                                                   |      |    |   |         |         |        |   |       |        |                                                                                                                                                                                   |      |    |   |         |         |        |   |       |        |
| true NE     | 14078.9                                                                                                                                                                           | 1931.1      |             |             |               |         |        |   |       |        |                                                                                                                                                                                   |      |    |   |         |         |        |   |       |        |                                                                                                                                                                                   |      |    |   |         |         |        |   |       |        |                                                                                                                                                                                   |      |    |   |         |         |        |   |       |        |                                                                                                                                                                                   |      |    |   |         |         |        |   |       |        |
| E           | 109.7                                                                                                                                                                             | 1114.3      |             |             |               |         |        |   |       |        |                                                                                                                                                                                   |      |    |   |         |         |        |   |       |        |                                                                                                                                                                                   |      |    |   |         |         |        |   |       |        |                                                                                                                                                                                   |      |    |   |         |         |        |   |       |        |                                                                                                                                                                                   |      |    |   |         |         |        |   |       |        |
| (C) Brain   |                                                                                                                                                                                   |             |             |             |               |         |        |   |       |        |                                                                                                                                                                                   |      |    |   |         |         |        |   |       |        |                                                                                                                                                                                   |      |    |   |         |         |        |   |       |        |                                                                                                                                                                                   |      |    |   |         |         |        |   |       |        |                                                                                                                                                                                   |      |    |   |         |         |        |   |       |        |
| ROC-AUC     | 0.916±0.006                                                                                                                                                                       | 0.932±0.007 | 0.942±0.007 | 0.958±0.005 | 0.960±0.005   |         |        |   |       |        |                                                                                                                                                                                   |      |    |   |         |         |        |   |       |        |                                                                                                                                                                                   |      |    |   |         |         |        |   |       |        |                                                                                                                                                                                   |      |    |   |         |         |        |   |       |        |                                                                                                                                                                                   |      |    |   |         |         |        |   |       |        |
| Accuracy    | 0.801±0.006                                                                                                                                                                       | 0.852±0.007 | 0.847±0.014 | 0.882±0.006 | 0.883±0.006   |         |        |   |       |        |                                                                                                                                                                                   |      |    |   |         |         |        |   |       |        |                                                                                                                                                                                   |      |    |   |         |         |        |   |       |        |                                                                                                                                                                                   |      |    |   |         |         |        |   |       |        |                                                                                                                                                                                   |      |    |   |         |         |        |   |       |        |
| BA          | 0.833±0.008                                                                                                                                                                       | 0.859±0.011 | 0.866±0.011 | 0.893±0.008 | 0.895±0.008   |         |        |   |       |        |                                                                                                                                                                                   |      |    |   |         |         |        |   |       |        |                                                                                                                                                                                   |      |    |   |         |         |        |   |       |        |                                                                                                                                                                                   |      |    |   |         |         |        |   |       |        |                                                                                                                                                                                   |      |    |   |         |         |        |   |       |        |
| Sensitivity | 0.869±0.019                                                                                                                                                                       | 0.868±0.024 | 0.888±0.031 | 0.906±0.019 | 0.910±0.018   |         |        |   |       |        |                                                                                                                                                                                   |      |    |   |         |         |        |   |       |        |                                                                                                                                                                                   |      |    |   |         |         |        |   |       |        |                                                                                                                                                                                   |      |    |   |         |         |        |   |       |        |                                                                                                                                                                                   |      |    |   |         |         |        |   |       |        |
| Specificity | 0.796±0.007                                                                                                                                                                       | 0.850±0.008 | 0.844±0.017 | 0.880±0.007 | 0.881±0.007   |         |        |   |       |        |                                                                                                                                                                                   |      |    |   |         |         |        |   |       |        |                                                                                                                                                                                   |      |    |   |         |         |        |   |       |        |                                                                                                                                                                                   |      |    |   |         |         |        |   |       |        |                                                                                                                                                                                   |      |    |   |         |         |        |   |       |        |
| CM          | <table border="1"> <tr><td>pred</td><td>NE</td><td>E</td></tr> <tr><td>true NE</td><td>12747.1</td><td>3262.9</td></tr> <tr><td>E</td><td>161.4</td><td>1072.6</td></tr> </table> | pred        | NE          | E           | true NE       | 12747.1 | 3262.9 | E | 161.4 | 1072.6 | <table border="1"> <tr><td>pred</td><td>NE</td><td>E</td></tr> <tr><td>true NE</td><td>13612.7</td><td>2397.3</td></tr> <tr><td>E</td><td>162.7</td><td>1071.3</td></tr> </table> | pred | NE | E | true NE | 13612.7 | 2397.3 | E | 162.7 | 1071.3 | <table border="1"> <tr><td>pred</td><td>NE</td><td>E</td></tr> <tr><td>true NE</td><td>13512.1</td><td>2497.9</td></tr> <tr><td>E</td><td>137.7</td><td>1096.3</td></tr> </table> | pred | NE | E | true NE | 13512.1 | 2497.9 | E | 137.7 | 1096.3 | <table border="1"> <tr><td>pred</td><td>NE</td><td>E</td></tr> <tr><td>true NE</td><td>14094.4</td><td>1915.6</td></tr> <tr><td>E</td><td>116.2</td><td>1117.8</td></tr> </table> | pred | NE | E | true NE | 14094.4 | 1915.6 | E | 116.2 | 1117.8 | <table border="1"> <tr><td>pred</td><td>NE</td><td>E</td></tr> <tr><td>true NE</td><td>14104.2</td><td>1905.8</td></tr> <tr><td>E</td><td>111.1</td><td>1122.9</td></tr> </table> | pred | NE | E | true NE | 14104.2 | 1905.8 | E | 111.1 | 1122.9 |
| pred        | NE                                                                                                                                                                                | E           |             |             |               |         |        |   |       |        |                                                                                                                                                                                   |      |    |   |         |         |        |   |       |        |                                                                                                                                                                                   |      |    |   |         |         |        |   |       |        |                                                                                                                                                                                   |      |    |   |         |         |        |   |       |        |                                                                                                                                                                                   |      |    |   |         |         |        |   |       |        |
| true NE     | 12747.1                                                                                                                                                                           | 3262.9      |             |             |               |         |        |   |       |        |                                                                                                                                                                                   |      |    |   |         |         |        |   |       |        |                                                                                                                                                                                   |      |    |   |         |         |        |   |       |        |                                                                                                                                                                                   |      |    |   |         |         |        |   |       |        |                                                                                                                                                                                   |      |    |   |         |         |        |   |       |        |
| E           | 161.4                                                                                                                                                                             | 1072.6      |             |             |               |         |        |   |       |        |                                                                                                                                                                                   |      |    |   |         |         |        |   |       |        |                                                                                                                                                                                   |      |    |   |         |         |        |   |       |        |                                                                                                                                                                                   |      |    |   |         |         |        |   |       |        |                                                                                                                                                                                   |      |    |   |         |         |        |   |       |        |
| pred        | NE                                                                                                                                                                                | E           |             |             |               |         |        |   |       |        |                                                                                                                                                                                   |      |    |   |         |         |        |   |       |        |                                                                                                                                                                                   |      |    |   |         |         |        |   |       |        |                                                                                                                                                                                   |      |    |   |         |         |        |   |       |        |                                                                                                                                                                                   |      |    |   |         |         |        |   |       |        |
| true NE     | 13612.7                                                                                                                                                                           | 2397.3      |             |             |               |         |        |   |       |        |                                                                                                                                                                                   |      |    |   |         |         |        |   |       |        |                                                                                                                                                                                   |      |    |   |         |         |        |   |       |        |                                                                                                                                                                                   |      |    |   |         |         |        |   |       |        |                                                                                                                                                                                   |      |    |   |         |         |        |   |       |        |
| E           | 162.7                                                                                                                                                                             | 1071.3      |             |             |               |         |        |   |       |        |                                                                                                                                                                                   |      |    |   |         |         |        |   |       |        |                                                                                                                                                                                   |      |    |   |         |         |        |   |       |        |                                                                                                                                                                                   |      |    |   |         |         |        |   |       |        |                                                                                                                                                                                   |      |    |   |         |         |        |   |       |        |
| pred        | NE                                                                                                                                                                                | E           |             |             |               |         |        |   |       |        |                                                                                                                                                                                   |      |    |   |         |         |        |   |       |        |                                                                                                                                                                                   |      |    |   |         |         |        |   |       |        |                                                                                                                                                                                   |      |    |   |         |         |        |   |       |        |                                                                                                                                                                                   |      |    |   |         |         |        |   |       |        |
| true NE     | 13512.1                                                                                                                                                                           | 2497.9      |             |             |               |         |        |   |       |        |                                                                                                                                                                                   |      |    |   |         |         |        |   |       |        |                                                                                                                                                                                   |      |    |   |         |         |        |   |       |        |                                                                                                                                                                                   |      |    |   |         |         |        |   |       |        |                                                                                                                                                                                   |      |    |   |         |         |        |   |       |        |
| E           | 137.7                                                                                                                                                                             | 1096.3      |             |             |               |         |        |   |       |        |                                                                                                                                                                                   |      |    |   |         |         |        |   |       |        |                                                                                                                                                                                   |      |    |   |         |         |        |   |       |        |                                                                                                                                                                                   |      |    |   |         |         |        |   |       |        |                                                                                                                                                                                   |      |    |   |         |         |        |   |       |        |
| pred        | NE                                                                                                                                                                                | E           |             |             |               |         |        |   |       |        |                                                                                                                                                                                   |      |    |   |         |         |        |   |       |        |                                                                                                                                                                                   |      |    |   |         |         |        |   |       |        |                                                                                                                                                                                   |      |    |   |         |         |        |   |       |        |                                                                                                                                                                                   |      |    |   |         |         |        |   |       |        |
| true NE     | 14094.4                                                                                                                                                                           | 1915.6      |             |             |               |         |        |   |       |        |                                                                                                                                                                                   |      |    |   |         |         |        |   |       |        |                                                                                                                                                                                   |      |    |   |         |         |        |   |       |        |                                                                                                                                                                                   |      |    |   |         |         |        |   |       |        |                                                                                                                                                                                   |      |    |   |         |         |        |   |       |        |
| E           | 116.2                                                                                                                                                                             | 1117.8      |             |             |               |         |        |   |       |        |                                                                                                                                                                                   |      |    |   |         |         |        |   |       |        |                                                                                                                                                                                   |      |    |   |         |         |        |   |       |        |                                                                                                                                                                                   |      |    |   |         |         |        |   |       |        |                                                                                                                                                                                   |      |    |   |         |         |        |   |       |        |
| pred        | NE                                                                                                                                                                                | E           |             |             |               |         |        |   |       |        |                                                                                                                                                                                   |      |    |   |         |         |        |   |       |        |                                                                                                                                                                                   |      |    |   |         |         |        |   |       |        |                                                                                                                                                                                   |      |    |   |         |         |        |   |       |        |                                                                                                                                                                                   |      |    |   |         |         |        |   |       |        |
| true NE     | 14104.2                                                                                                                                                                           | 1905.8      |             |             |               |         |        |   |       |        |                                                                                                                                                                                   |      |    |   |         |         |        |   |       |        |                                                                                                                                                                                   |      |    |   |         |         |        |   |       |        |                                                                                                                                                                                   |      |    |   |         |         |        |   |       |        |                                                                                                                                                                                   |      |    |   |         |         |        |   |       |        |
| E           | 111.1                                                                                                                                                                             | 1122.9      |             |             |               |         |        |   |       |        |                                                                                                                                                                                   |      |    |   |         |         |        |   |       |        |                                                                                                                                                                                   |      |    |   |         |         |        |   |       |        |                                                                                                                                                                                   |      |    |   |         |         |        |   |       |        |                                                                                                                                                                                   |      |    |   |         |         |        |   |       |        |
| (D) Human   |                                                                                                                                                                                   |             |             |             |               |         |        |   |       |        |                                                                                                                                                                                   |      |    |   |         |         |        |   |       |        |                                                                                                                                                                                   |      |    |   |         |         |        |   |       |        |                                                                                                                                                                                   |      |    |   |         |         |        |   |       |        |                                                                                                                                                                                   |      |    |   |         |         |        |   |       |        |
| ROC-AUC     | 0.909±0.008                                                                                                                                                                       | 0.912±0.010 | 0.942±0.008 | 0.957±0.006 | 0.957±0.007   |         |        |   |       |        |                                                                                                                                                                                   |      |    |   |         |         |        |   |       |        |                                                                                                                                                                                   |      |    |   |         |         |        |   |       |        |                                                                                                                                                                                   |      |    |   |         |         |        |   |       |        |                                                                                                                                                                                   |      |    |   |         |         |        |   |       |        |
| Accuracy    | 0.790±0.008                                                                                                                                                                       | 0.822±0.007 | 0.843±0.006 | 0.878±0.007 | 0.877±0.007   |         |        |   |       |        |                                                                                                                                                                                   |      |    |   |         |         |        |   |       |        |                                                                                                                                                                                   |      |    |   |         |         |        |   |       |        |                                                                                                                                                                                   |      |    |   |         |         |        |   |       |        |                                                                                                                                                                                   |      |    |   |         |         |        |   |       |        |
| BA          | 0.825±0.011                                                                                                                                                                       | 0.831±0.012 | 0.867±0.011 | 0.889±0.011 | 0.888±0.013   |         |        |   |       |        |                                                                                                                                                                                   |      |    |   |         |         |        |   |       |        |                                                                                                                                                                                   |      |    |   |         |         |        |   |       |        |                                                                                                                                                                                   |      |    |   |         |         |        |   |       |        |                                                                                                                                                                                   |      |    |   |         |         |        |   |       |        |
| Sensitivity | 0.865±0.022                                                                                                                                                                       | 0.842±0.023 | 0.896±0.021 | 0.903±0.020 | 0.902±0.023   |         |        |   |       |        |                                                                                                                                                                                   |      |    |   |         |         |        |   |       |        |                                                                                                                                                                                   |      |    |   |         |         |        |   |       |        |                                                                                                                                                                                   |      |    |   |         |         |        |   |       |        |                                                                                                                                                                                   |      |    |   |         |         |        |   |       |        |
| Specificity | 0.784±0.009                                                                                                                                                                       | 0.820±0.007 | 0.839±0.007 | 0.876±0.007 | 0.875±0.007   |         |        |   |       |        |                                                                                                                                                                                   |      |    |   |         |         |        |   |       |        |                                                                                                                                                                                   |      |    |   |         |         |        |   |       |        |                                                                                                                                                                                   |      |    |   |         |         |        |   |       |        |                                                                                                                                                                                   |      |    |   |         |         |        |   |       |        |
| CM          | <table border="1"> <tr><td>pred</td><td>NE</td><td>E</td></tr> <tr><td>true NE</td><td>12541.8</td><td>3450.2</td></tr> <tr><td>E</td><td>167.7</td><td>1074.3</td></tr> </table> | pred        | NE          | E           | true NE       | 12541.8 | 3450.2 | E | 167.7 | 1074.3 | <table border="1"> <tr><td>pred</td><td>NE</td><td>E</td></tr> <tr><td>true NE</td><td>13113.1</td><td>2878.9</td></tr> <tr><td>E</td><td>196.0</td><td>1046.0</td></tr> </table> | pred | NE | E | true NE | 13113.1 | 2878.9 | E | 196.0 | 1046.0 | <table border="1"> <tr><td>pred</td><td>NE</td><td>E</td></tr> <tr><td>true NE</td><td>13418.7</td><td>2573.3</td></tr> <tr><td>E</td><td>129.3</td><td>1112.7</td></tr> </table> | pred | NE | E | true NE | 13418.7 | 2573.3 | E | 129.3 | 1112.7 | <table border="1"> <tr><td>pred</td><td>NE</td><td>E</td></tr> <tr><td>true NE</td><td>14003.3</td><td>1988.7</td></tr> <tr><td>E</td><td>120.8</td><td>1121.2</td></tr> </table> | pred | NE | E | true NE | 14003.3 | 1988.7 | E | 120.8 | 1121.2 | <table border="1"> <tr><td>pred</td><td>NE</td><td>E</td></tr> <tr><td>true NE</td><td>13987.9</td><td>2004.1</td></tr> <tr><td>E</td><td>121.4</td><td>1120.6</td></tr> </table> | pred | NE | E | true NE | 13987.9 | 2004.1 | E | 121.4 | 1120.6 |
| pred        | NE                                                                                                                                                                                | E           |             |             |               |         |        |   |       |        |                                                                                                                                                                                   |      |    |   |         |         |        |   |       |        |                                                                                                                                                                                   |      |    |   |         |         |        |   |       |        |                                                                                                                                                                                   |      |    |   |         |         |        |   |       |        |                                                                                                                                                                                   |      |    |   |         |         |        |   |       |        |
| true NE     | 12541.8                                                                                                                                                                           | 3450.2      |             |             |               |         |        |   |       |        |                                                                                                                                                                                   |      |    |   |         |         |        |   |       |        |                                                                                                                                                                                   |      |    |   |         |         |        |   |       |        |                                                                                                                                                                                   |      |    |   |         |         |        |   |       |        |                                                                                                                                                                                   |      |    |   |         |         |        |   |       |        |
| E           | 167.7                                                                                                                                                                             | 1074.3      |             |             |               |         |        |   |       |        |                                                                                                                                                                                   |      |    |   |         |         |        |   |       |        |                                                                                                                                                                                   |      |    |   |         |         |        |   |       |        |                                                                                                                                                                                   |      |    |   |         |         |        |   |       |        |                                                                                                                                                                                   |      |    |   |         |         |        |   |       |        |
| pred        | NE                                                                                                                                                                                | E           |             |             |               |         |        |   |       |        |                                                                                                                                                                                   |      |    |   |         |         |        |   |       |        |                                                                                                                                                                                   |      |    |   |         |         |        |   |       |        |                                                                                                                                                                                   |      |    |   |         |         |        |   |       |        |                                                                                                                                                                                   |      |    |   |         |         |        |   |       |        |
| true NE     | 13113.1                                                                                                                                                                           | 2878.9      |             |             |               |         |        |   |       |        |                                                                                                                                                                                   |      |    |   |         |         |        |   |       |        |                                                                                                                                                                                   |      |    |   |         |         |        |   |       |        |                                                                                                                                                                                   |      |    |   |         |         |        |   |       |        |                                                                                                                                                                                   |      |    |   |         |         |        |   |       |        |
| E           | 196.0                                                                                                                                                                             | 1046.0      |             |             |               |         |        |   |       |        |                                                                                                                                                                                   |      |    |   |         |         |        |   |       |        |                                                                                                                                                                                   |      |    |   |         |         |        |   |       |        |                                                                                                                                                                                   |      |    |   |         |         |        |   |       |        |                                                                                                                                                                                   |      |    |   |         |         |        |   |       |        |
| pred        | NE                                                                                                                                                                                | E           |             |             |               |         |        |   |       |        |                                                                                                                                                                                   |      |    |   |         |         |        |   |       |        |                                                                                                                                                                                   |      |    |   |         |         |        |   |       |        |                                                                                                                                                                                   |      |    |   |         |         |        |   |       |        |                                                                                                                                                                                   |      |    |   |         |         |        |   |       |        |
| true NE     | 13418.7                                                                                                                                                                           | 2573.3      |             |             |               |         |        |   |       |        |                                                                                                                                                                                   |      |    |   |         |         |        |   |       |        |                                                                                                                                                                                   |      |    |   |         |         |        |   |       |        |                                                                                                                                                                                   |      |    |   |         |         |        |   |       |        |                                                                                                                                                                                   |      |    |   |         |         |        |   |       |        |
| E           | 129.3                                                                                                                                                                             | 1112.7      |             |             |               |         |        |   |       |        |                                                                                                                                                                                   |      |    |   |         |         |        |   |       |        |                                                                                                                                                                                   |      |    |   |         |         |        |   |       |        |                                                                                                                                                                                   |      |    |   |         |         |        |   |       |        |                                                                                                                                                                                   |      |    |   |         |         |        |   |       |        |
| pred        | NE                                                                                                                                                                                | E           |             |             |               |         |        |   |       |        |                                                                                                                                                                                   |      |    |   |         |         |        |   |       |        |                                                                                                                                                                                   |      |    |   |         |         |        |   |       |        |                                                                                                                                                                                   |      |    |   |         |         |        |   |       |        |                                                                                                                                                                                   |      |    |   |         |         |        |   |       |        |
| true NE     | 14003.3                                                                                                                                                                           | 1988.7      |             |             |               |         |        |   |       |        |                                                                                                                                                                                   |      |    |   |         |         |        |   |       |        |                                                                                                                                                                                   |      |    |   |         |         |        |   |       |        |                                                                                                                                                                                   |      |    |   |         |         |        |   |       |        |                                                                                                                                                                                   |      |    |   |         |         |        |   |       |        |
| E           | 120.8                                                                                                                                                                             | 1121.2      |             |             |               |         |        |   |       |        |                                                                                                                                                                                   |      |    |   |         |         |        |   |       |        |                                                                                                                                                                                   |      |    |   |         |         |        |   |       |        |                                                                                                                                                                                   |      |    |   |         |         |        |   |       |        |                                                                                                                                                                                   |      |    |   |         |         |        |   |       |        |
| pred        | NE                                                                                                                                                                                | E           |             |             |               |         |        |   |       |        |                                                                                                                                                                                   |      |    |   |         |         |        |   |       |        |                                                                                                                                                                                   |      |    |   |         |         |        |   |       |        |                                                                                                                                                                                   |      |    |   |         |         |        |   |       |        |                                                                                                                                                                                   |      |    |   |         |         |        |   |       |        |
| true NE     | 13987.9                                                                                                                                                                           | 2004.1      |             |             |               |         |        |   |       |        |                                                                                                                                                                                   |      |    |   |         |         |        |   |       |        |                                                                                                                                                                                   |      |    |   |         |         |        |   |       |        |                                                                                                                                                                                   |      |    |   |         |         |        |   |       |        |                                                                                                                                                                                   |      |    |   |         |         |        |   |       |        |
| E           | 121.4                                                                                                                                                                             | 1120.6      |             |             |               |         |        |   |       |        |                                                                                                                                                                                   |      |    |   |         |         |        |   |       |        |                                                                                                                                                                                   |      |    |   |         |         |        |   |       |        |                                                                                                                                                                                   |      |    |   |         |         |        |   |       |        |                                                                                                                                                                                   |      |    |   |         |         |        |   |       |        |

**Table F. Comparison of sveLGBM and CLEARER on OGEE+DEG labelling for the prediction of cEGs.** *Hs Features* refer to the features collected for Homo Sapiens EGs prediction presented in the work [12]. sveLGBM hyperparameters: n\_voters=16, learning\_rate=0.1, n\_estimators=200, boosting\_type='gbdt'. CLEARER hyperparameter: RF n\_estimators=500 as in [12].

| method      | sveLGBM (HELP)                                                                                                                                                          | RandomForest (CLEARER) |   |    |        |     |    |    |      |       |                                                                                                                                                                         |      |   |    |        |     |     |    |     |       |
|-------------|-------------------------------------------------------------------------------------------------------------------------------------------------------------------------|------------------------|---|----|--------|-----|----|----|------|-------|-------------------------------------------------------------------------------------------------------------------------------------------------------------------------|------|---|----|--------|-----|-----|----|-----|-------|
|             | Bio+CCcfs+N2V                                                                                                                                                           | Hs Features            |   |    |        |     |    |    |      |       |                                                                                                                                                                         |      |   |    |        |     |     |    |     |       |
| metric      |                                                                                                                                                                         | reduced by lasso       |   |    |        |     |    |    |      |       |                                                                                                                                                                         |      |   |    |        |     |     |    |     |       |
| ROC-AUC     | 0.9728±0.0051                                                                                                                                                           | 0.9682±0.0024          |   |    |        |     |    |    |      |       |                                                                                                                                                                         |      |   |    |        |     |     |    |     |       |
| Accuracy    | 0.9111±0.0068                                                                                                                                                           | 0.9625±0.0025          |   |    |        |     |    |    |      |       |                                                                                                                                                                         |      |   |    |        |     |     |    |     |       |
| BA          | 0.9130±0.0144                                                                                                                                                           | 0.7844±0.0123          |   |    |        |     |    |    |      |       |                                                                                                                                                                         |      |   |    |        |     |     |    |     |       |
| Sensitivity | 0.9152±0.0359                                                                                                                                                           | 0.5834±0.0240          |   |    |        |     |    |    |      |       |                                                                                                                                                                         |      |   |    |        |     |     |    |     |       |
| Specificity | 0.9108±0.0090                                                                                                                                                           | 0.9854±0.0019          |   |    |        |     |    |    |      |       |                                                                                                                                                                         |      |   |    |        |     |     |    |     |       |
| CM          | <table border="1"> <tr><td>pred</td><td>E</td><td>NE</td></tr> <tr><td>true E</td><td>755</td><td>70</td></tr> <tr><td>NE</td><td>1177</td><td>12019</td></tr> </table> | pred                   | E | NE | true E | 755 | 70 | NE | 1177 | 12019 | <table border="1"> <tr><td>pred</td><td>E</td><td>NE</td></tr> <tr><td>true E</td><td>486</td><td>347</td></tr> <tr><td>NE</td><td>200</td><td>13543</td></tr> </table> | pred | E | NE | true E | 486 | 347 | NE | 200 | 13543 |
| pred        | E                                                                                                                                                                       | NE                     |   |    |        |     |    |    |      |       |                                                                                                                                                                         |      |   |    |        |     |     |    |     |       |
| true E      | 755                                                                                                                                                                     | 70                     |   |    |        |     |    |    |      |       |                                                                                                                                                                         |      |   |    |        |     |     |    |     |       |
| NE          | 1177                                                                                                                                                                    | 12019                  |   |    |        |     |    |    |      |       |                                                                                                                                                                         |      |   |    |        |     |     |    |     |       |
| pred        | E                                                                                                                                                                       | NE                     |   |    |        |     |    |    |      |       |                                                                                                                                                                         |      |   |    |        |     |     |    |     |       |
| true E      | 486                                                                                                                                                                     | 347                    |   |    |        |     |    |    |      |       |                                                                                                                                                                         |      |   |    |        |     |     |    |     |       |
| NE          | 200                                                                                                                                                                     | 13543                  |   |    |        |     |    |    |      |       |                                                                                                                                                                         |      |   |    |        |     |     |    |     |       |

**Table G. Comparison of sveLGBM, DeepHE and EPGAT predictions on HELP labelling for Kidney-, Lung-, Brain-specific EGs, and cEGs (Human).** EPGAT running with PPI input and sublocalisation attributes. EPGAT hyper-parameters are optimised by using the provided tuning function. DeepHE running with DNA sequencing extracted features plus node2vec embedding 120-sized features extracted from the PPI. HELP running with Bio+CCcfs + N2V embedding 120-sized features extracted from the PPI.

| metric | Kidney      |             |             | Lung        |             |             |
|--------|-------------|-------------|-------------|-------------|-------------|-------------|
|        | EPGAT       | DeepHE      | sveLGBM     | EPGAT       | DeepHE      | sveLGBM     |
| AUC    | 0.902±0.007 | 0.921±0.016 | 0.957±0.006 | 0.913±0.009 | 0.916±0.021 | 0.958±0.005 |
| Acc.   | 0.834±0.028 | 0.845±0.016 | 0.894±0.004 | 0.843±0.032 | 0.845±0.023 | 0.895±0.004 |
| BA     | 0.824±0.012 | 0.845±0.016 | 0.890±0.009 | 0.832±0.014 | 0.845±0.023 | 0.892±0.010 |
| Sens.  | 0.813±0.045 | 0.866±0.02  | 0.886±0.019 | 0.819±0.051 | 0.877±0.029 | 0.889±0.020 |
| Spec.  | 0.835±0.033 | 0.824±0.024 | 0.894±0.004 | 0.845±0.037 | 0.812±0.028 | 0.895±0.005 |
| metric | Brain       |             |             | Human       |             |             |
|        | EPGAT       | DeepHE      | sveLGBM     | EPGAT       | DeepHE      | sveLGBM     |
| AUC    | 0.908±0.012 | 0.921±0.009 | 0.959±0.005 | 0.880±0.017 | 0.91±0.02   | 0.957±0.007 |
| Acc.   | 0.857±0.022 | 0.847±0.012 | 0.898±0.006 | 0.784±0.043 | 0.83±0.027  | 0.891±0.006 |
| BA     | 0.833±0.008 | 0.847±0.012 | 0.894±0.009 | 0.798±0.020 | 0.83±0.027  | 0.886±0.013 |
| Sens.  | 0.806±0.027 | 0.884±0.022 | 0.890±0.019 | 0.815±0.063 | 0.898±0.037 | 0.880±0.024 |
| Spec.  | 0.861±0.026 | 0.811±0.024 | 0.898±0.006 | 0.781±0.050 | 0.762±0.047 | 0.892±0.007 |

**Table H. Optimal hyper-parameters of sveLGBM, DeepHE and EPGAT methods used in comparison of Table G.**

| method  | Kidney                                                                                             | Lung                                                                                               | Brain                                                                                                          | Human                                                                                                   |
|---------|----------------------------------------------------------------------------------------------------|----------------------------------------------------------------------------------------------------|----------------------------------------------------------------------------------------------------------------|---------------------------------------------------------------------------------------------------------|
| EPGAT   | epochs=1000,<br>lr=0.005,<br>weight_decay=0.0005,<br>h_feats=[8,1],<br>heads=[8,1],<br>dropout=0.4 | epochs=1000,<br>lr=0.005,<br>weight_decay=0.0005,<br>h_feats=[8,1],<br>heads=[8,1],<br>dropout=0.4 | epochs=1000,<br>lr=0.00057,<br>weight_decay=0.000247,<br>h_feats=[32,8, 1],<br>heads=[8,4,1],<br>dropout=0.137 | epochs=1000,<br>lr=0.0023,<br>weight_decay=0.000126,<br>h_feats=[64,1],<br>heads=[4,1],<br>dropout=0.34 |
| DeepHE  | epochs=50, batch_size=32, dropout=0.2, h_feats=[128,256,512], folding=1                            |                                                                                                    |                                                                                                                |                                                                                                         |
| sveLGBM | n_voters=13, n_estimators=200, boosting_type=gbdt, learning_rate=0.1                               |                                                                                                    |                                                                                                                |                                                                                                         |

**Table I. “E vs sNE”, “E vs aE” and “aE vs sNE” classification performance based on HELP labelling.** The case study is Kidney tissue using Bio+CCcfs+N2V features. Averages and errors of metrics are obtained on fifty measurements related to ten times iterated 5-fold cross-validation. The averaged Confusion Matrix (CM) is also shown.

| problem     | E vs sNE    |     | E vs aE     |        | aE vs sNE   |     |        |        |
|-------------|-------------|-----|-------------|--------|-------------|-----|--------|--------|
| ROC-AUC     | 0.973±0.004 |     | 0.895±0.009 |        | 0.751±0.010 |     |        |        |
| Accuracy    | 0.915±0.005 |     | 0.797±0.012 |        | 0.713±0.007 |     |        |        |
| BA          | 0.915±0.007 |     | 0.813±0.012 |        | 0.687±0.010 |     |        |        |
| Sensitivity | 0.916±0.016 |     | 0.849±0.021 |        | 0.644±0.019 |     |        |        |
| Specificity | 0.915±0.005 |     | 0.776±0.016 |        | 0.729±0.008 |     |        |        |
| CM          | pred        | sNE | E           | pred   | aE          | E   |        |        |
|             | true        | sNE | 11790.0     | 1096.0 | pred        | aE  | 2412.3 | 695.7  |
|             | true        | E   | 104.8       | 1137.2 | true        | sNE | 9396.4 | 3489.6 |
|             | true        | aE  | 187.7       | 1054.3 | true        | aE  | 1106.2 | 2001.8 |

## References

1. Szklarczyk D, Gable AL, Lyon D, Junge A, Wyder S, Huerta-Cepas J, et al. STRING v11: protein–protein association networks with increased coverage, supporting functional discovery in genome-wide experimental datasets. *Nucleic acids research*. 2019;47(D1):D607–D613. <https://doi.org/10.1093/nar/gky1131> PMID: [PMC6323986](https://pubmed.ncbi.nlm.nih.gov/3225261/)
2. Durinck S, Spellman PT, Birney E, Huber W. Mapping identifiers for the integration of genomic datasets with the R/Bioconductor package biomaRt. *Nature Protocols*. 2009;4:1184–1191. <https://doi.org/10.1038/nprot.2009.97> PMID: [PMC3159387](https://pubmed.ncbi.nlm.nih.gov/19545503/)
3. Ardlie KG, Deluca DS, Segrè AV, Sullivan TJ, Young TR Young, Gelfand ET, et al. The Genotype-Tissue Expression (GTEx) pilot analysis: Multitissue gene regulation in humans. *Science*. 2015;348(6235):648–660. <https://doi.org/10.1126/science.1262110> PMID: [PMC4547484](https://pubmed.ncbi.nlm.nih.gov/25868887/)
4. Sherman BT, Hao M, Qiu J, Jiao X, Baseler MW, Lane HC, Imamichi T, et al. DAVID: a web server for functional enrichment analysis and functional annotation of gene lists (2021 update). *Nucleic Acids Res*. 2022;50(W1):W216–W221. <https://doi.org/10.1093/nar/gkac194> PMID: [PMC9252805](https://pubmed.ncbi.nlm.nih.gov/35711959/)
5. Tang G, Cho M, Wang X. OncoDB: an interactive online database for analysis of gene expression and viral infection in cancer. *Nucleic Acids Res*. 2022;50(D1):D1334–D1339. <https://doi.org/10.1093/nar/gkab970> PMID: [PMC8728272](https://pubmed.ncbi.nlm.nih.gov/35711959/)
6. Uhlén M, Fagerberg L, Hallström BM, Lindskog C, Oksvold P, Mardinoglu A, et al. Tissue-based map of the human proteome. *Science*. 2015;347(6220). <https://doi.org/10.1126/science.1260419> PMID: [25613900](https://pubmed.ncbi.nlm.nih.gov/25613900/)
7. Binder JX, Pletscher-Frankild S, Tsafou K, Stolte C, O'Donoghue SI, Schneider R, et al. COMPARTMENTS: unification and visualization of protein subcellular localization evidence. *Database*. 2014;2014. <https://doi.org/10.1093/database/bau012> PMID: [PMC3935310](https://pubmed.ncbi.nlm.nih.gov/25000000/)
8. Sayers EW, Bolton EE, Brister JR, Canese K, Chan J, Comeau DC, et al. Database resources of the National Center for Biotechnology Information in 2023. *Nucleic Acids Res*. 2023;51(D1):D29–D38. <https://doi.org/10.1093/nar/gkaa892> PMID: [PMC7778943](https://pubmed.ncbi.nlm.nih.gov/36418719/)
9. Liu SH, Shen PC, Chen CY, Hsu A-N, Cho Y-C, Lai Y-L, et al. DriverDBv3: a multi-omics database for cancer driver gene research. *Nucleic Acids Res*. 2020;48(D1):D863–D870. <https://doi.org/10.1093/nar/gkz964> PMID: [PMC7145679](https://pubmed.ncbi.nlm.nih.gov/32811959/)
10. Piñero J, Ramírez-Anguita JM, Saüch-Pitarch J, Ronzano F, Centeno E, Sanz F, et al. The DisGeNET knowledge platform for disease genomics: 2019 update. *Nucleic Acids Res*. 2020;48(D1):D845–D855. <https://doi.org/10.1093/nar/gkz1021> PMID: [PMC7145631](https://pubmed.ncbi.nlm.nih.gov/32811959/)
11. Akiba T, Sano S, Yanase T, Ohta T, Koyama M. Optuna: A Next-generation Hyperparameter Optimization Framework. In: *Proceedings of the 25th ACM SIGKDD International Conference on Knowledge Discovery and Data Mining*; 2019. <https://doi.org/10.1145/3292500.3330701>
12. Beder T, Aromolaran O, Dönitz J, Tapanelli S, Adedeji EO, Adebisi E, et al. Identifying essential genes across eukaryotes by machine learning. *NAR Genom Bioinform*. 2021;3(4):lqab110. <https://doi.org/10.1093/nargab/lqab110> PMID: [PMC8634067](https://pubmed.ncbi.nlm.nih.gov/34411959/)
